# Supplementary material
Source: Springer Nature journal article supplement (https://www.springermedizin.de/resource/supplementary/12936_2012_2550_MOESM5_ESM.pdf/9543122)

**A**

Price in Intervention Districts

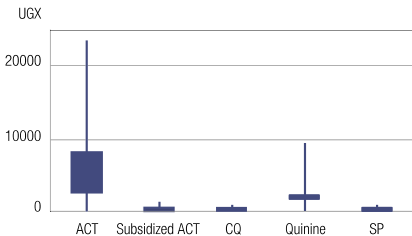

Price in Control District

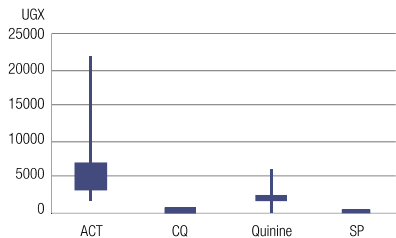**B**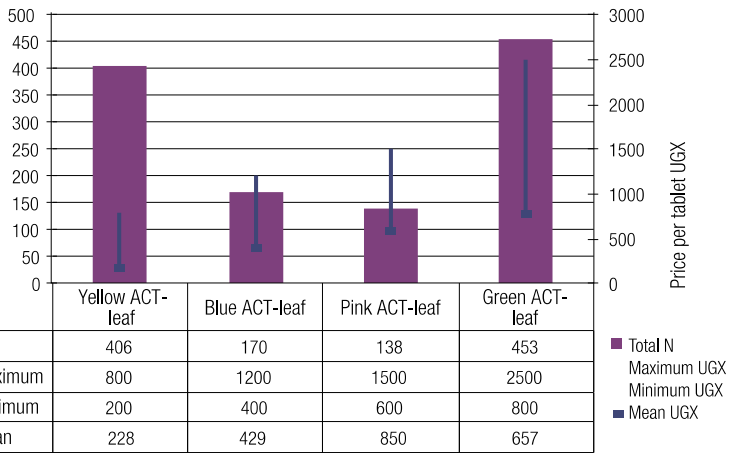

Supplement: MOESM5 [file 9543122]
